# Supplementary material for: Electrochemically tuneable hydrogen bonding interactions between a phenyl-urea terminated dendrimer and phenanthrenequinoneElectronic supplementary information (ESI) available: 1H NMR titration and cyclic voltammetry data. See http://www.rsc.org/suppdata/cc/b2/b211370h/
Source: Royal Society of Chemistry journal article supplement (doi:10.1039/b211370h), 2003-02-20

Electronic Supplementary Information

#### 1.A typical 1H NMR titration result for the complex formed between 1 and 4

The shift () in the CON***H***CH2 urea proton of dendrimer **4** (7 x 10-3 M in DMF-d7) was monitored upon the addition of aliquots of **1**.

A typical result is presented below.

| Concentration of **1** [mol l-1] x 10-2 |  | 0.696 | 2.79 | 5.57 | 11.1 |
| --- | --- | --- | --- | --- | --- |
| Molar ratio of **1** versus urea groups |  | 1/16 | 1/4 | ½ | 1 |
| Shift in the CON***H***CH2 urea proton  [ppm] |  | 0.011 | 0.029 | 0.056 | 0.096 |
|  |  |  |  |  |

The total amount of **1** added was limited to its solubility in DMF.

#### 2. Typical cyclic voltammetry data for 1 upon the addition of 4

To a solution of **1** (1.9 x 10-3 M) in DMF (containing 0.1M Bu4NPF6) was added dendrimer **4**. The change in E½ (measured using cyclic voltammetry) was recorded in the presence of increasing amounts of **4**.

| Concentration of **4**  *[mol l-1] x 10-2* | Molar ratio of urea groups and **1** | E1/2 *[mV]* |  E1/2 *[mV]* |
| --- | --- | --- | --- |
|  |  |  |  |
| 0 | 0 | -541.0 | 0.0 |
| 0.006 | 0.51 | -533.0 | 8.0 |
| 0.012 | 1.02 | -530.0 | 11.0 |
| 0.024 | 1.99 | -526.5 | 14.5 |
| 0.048 | 3.99 | -515.0 | 26.0 |
| 0.096 | 8.02 | -499.0 | 42.0 |
| 0.197 | 16.41 | -479.5 | 61.5 |
| 0.294 | 24.48 | -468.5 | 72.5 |
| 0.384 | 31.99 | -461.5 | 79.5 |
| 0.576 | 47.98 | -450.0 | 91.0 |
| 0.672 | 56.00 | -445.5 | 95.5 |

Plot of ΔE1/2 versus ratio urea groups/phenanthrenequinone

3. Typical change in the reversibility of the redox wave of 1 (at different scan rates) following the addition of an excess of dendrimer 4


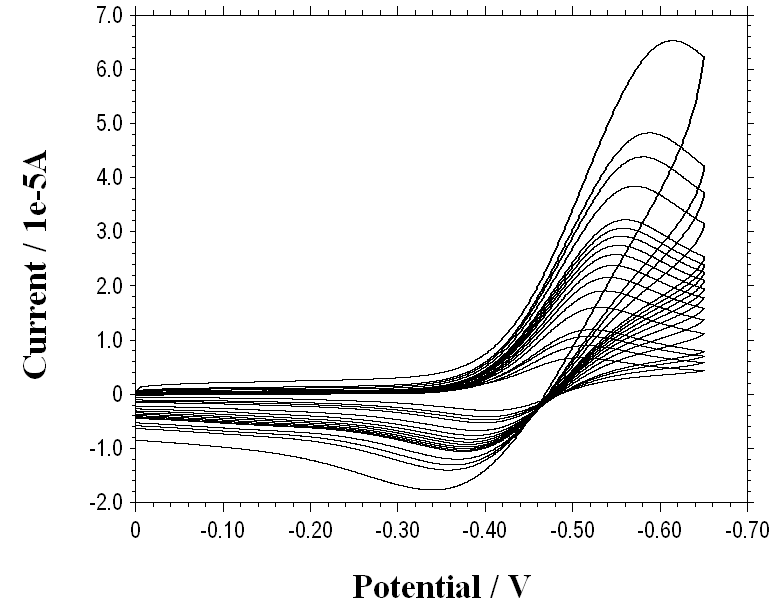


Cyclic voltammetry (CV) studies of  **1** inDMF solution containing 0.1 M Bu4NPF6 (~9 x 10-4 M )recorded in the presence of excess **4** (~6 x 10-3 M) at different scan rates: 0.025 (smallest current), 0.05 0.075, 0.1, 0.2, 0.3, 0.4, 0.5, 0.6, 0.7, 0.8, 0.9, 1.0, 1.5, 2.0, 2.5, 5.0 V s-1 (largest current). CV’s at scan rate of (a) 0.025 and (b) 5.0 V s-1 are shown below.


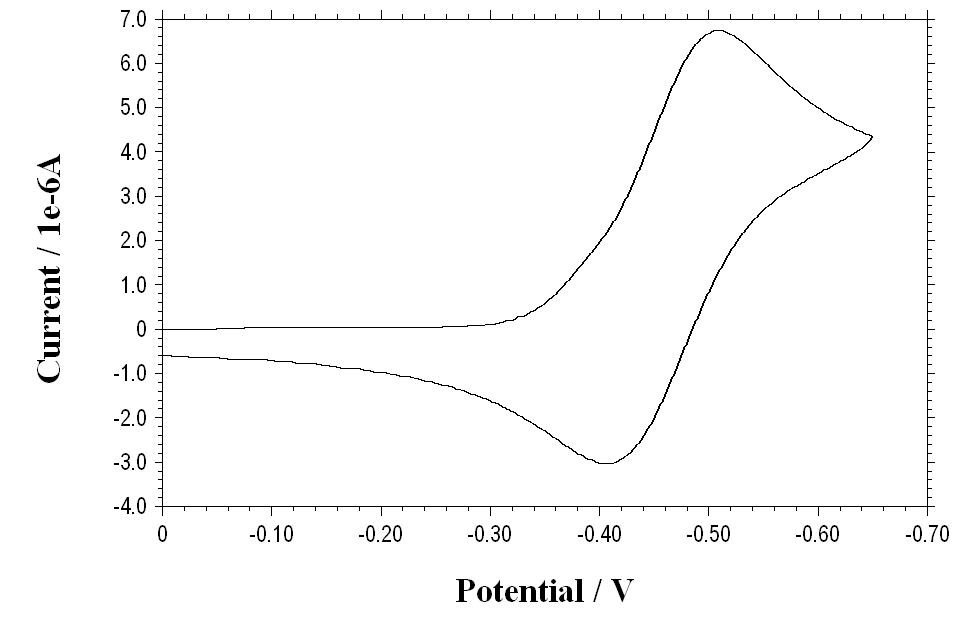
(a) Scan rate 0.025 V s-1

(b) Scan rate 5 V s-1


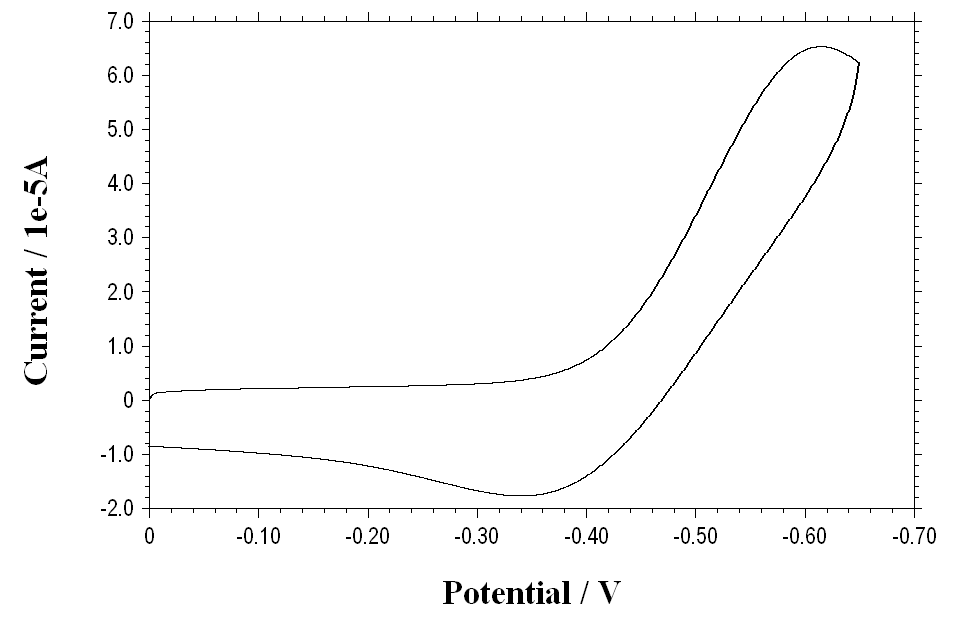

Supplement: b211370h.doc [file b211370h.doc]
